# Supplementary material for: Implementing the battery-operated hand-held fan as an evidence-based, non-pharmacological intervention for chronic breathlessness in patients with chronic obstructive pulmonary disease (COPD): a qualitative study of the views of specialist respiratory clinicians
Source: Research Square preprint supplement (doi:10.21203/rs.3.rs-900097/v1), 2021-09-15
Supplement: Supplementary file 2 [file 7aa396b050338869e3e01a57.docx]

**Table 1.** Characteristics of 49 clinicians from specialist respiratory care who participated in 9 focus groups exploring barriers and facilitators to implementing the battery-operated hand-held fan for chronic breathlessness in patients with COPD

| **Characteristic** |  | | **N = 49 (%)** |
| --- | --- | --- | --- |
| Gender | Female | | 36 (73.5) |
|  | Male | | 13 (26.5) |
| Setting | Inpatient | | 34 (69.4) |
|  | Inpatient/outpatient | | 8 (16.3) |
| Discipline | *Medical* | | *13 (26.5)* |
|  |  | Registrar | 12 (24.5) | |
|  |  | Consultant | 1 (2) | |
|  | *Nursing* | | *30 (61.2)* |
|  |  | CNC | 1 (2) | |
|  |  | CNE | 1 (2) | |
|  |  | CNS | 2 (4.1) | |
|  |  | EEN | 3 (6.1) | |
|  |  | RN | 21 (42.9) | |
|  | *Allied health* | | *6 (12.2)* |
|  |  | Physiotherapist | 5 (10.2) | |
|  |  | OT | 1 | |
| Years working in respiratory care | < 1 year | | 6 (12.2) |
| 1-5 years | | 23 (46.9) |
|  | 6-10 years | | 8 (16.3) |
|  | >10 years | | 12 (24.5) |
| “*To what proportion of patients with COPD and chronic breathlessness do you currently recommend the hand-held fan?*” | All or nearly all | | 10 (20.4) |
| Most | | 17 (34.7) |
| Some | | 19 (38.8) |
| None | | 3 (6.1) |

CNC = clinical nurse consultant; CNE = clinical nurse educator; CNS = clinical nurse specialist; EEN = endorsed enrolled nurse; RN = registered nurse; OT = occupational therapist
